# Supplementary material for: Harnessing the PD-L1 interface peptide for positron emission tomography imaging of the PD-1 immune checkpoint
Source: PubMed Central journal article supplement — RSC Chem Biol. 2020 Aug 27;1(4):214–24. doi: 10.1039/d0cb00070a (PMC8341843; doi:10.1039/d0cb00070a), 2020-08-27
Supplement: CB-001-D0CB00070A-s001.pdf [file CB-001-D0CB00070A-s001.pdf]

# Supplementary Materials

## Harnessing PD-L1 interface peptide for positron emission tomography imaging of PD-1 immune checkpoint

Kuan Hu et al.

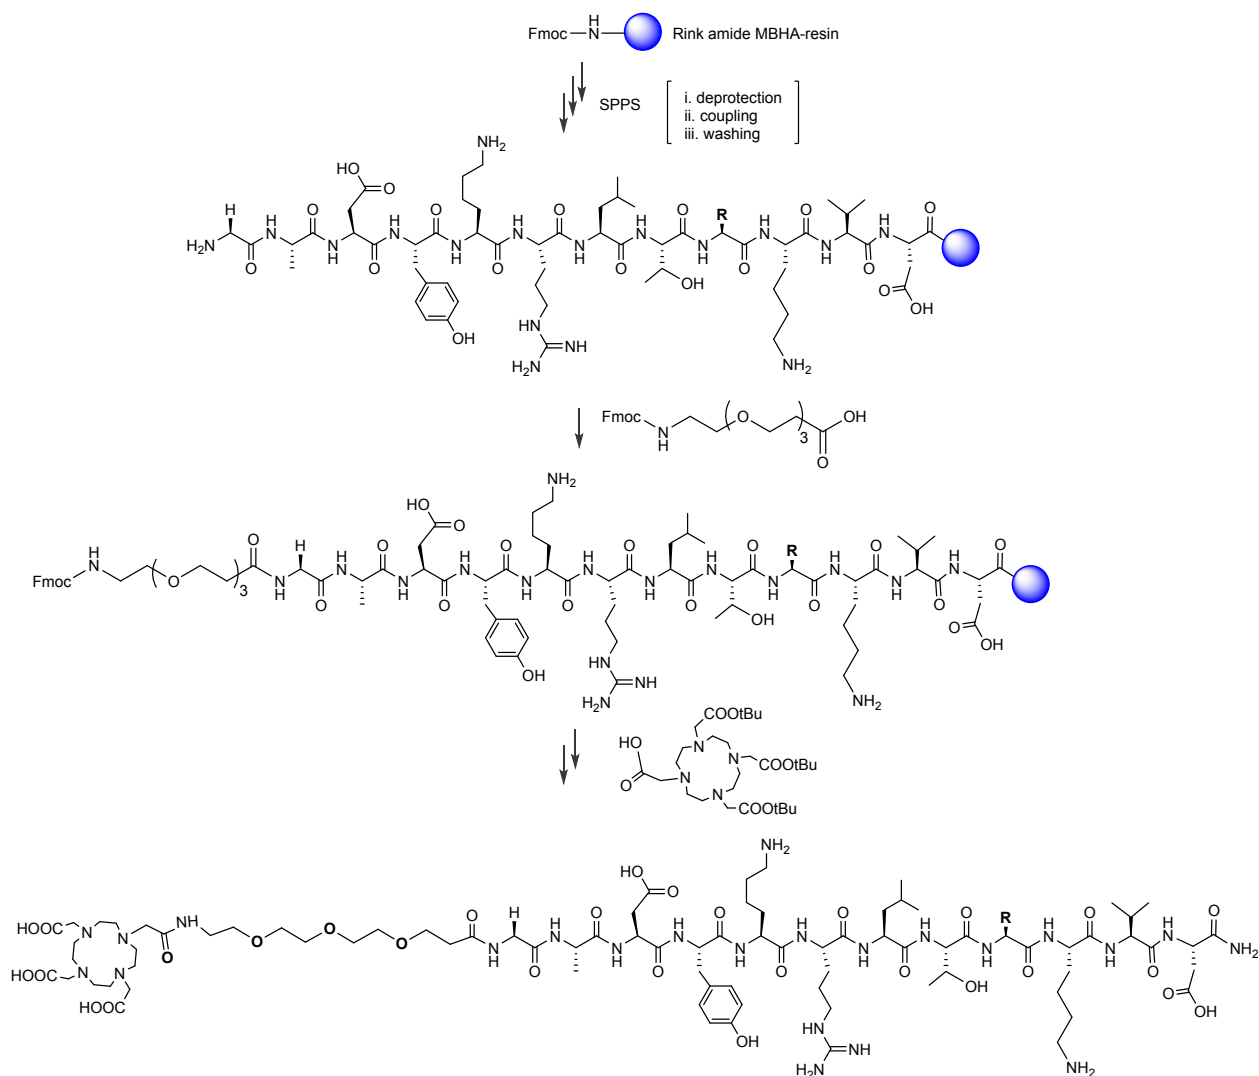

**Scheme S1.** Fmoc-based solid-phase peptide synthesis of m(h)-Pep-1. R group is the side chain of leucine in mPep-1-DOTA or the side chain of Valine in hPep-1-DOTA.

**Table S1.** Biodistribution of hPep-1-[<sup>64</sup>Cu] in B16F10 tumor bearing mice (*n* = 3) at 5 min, 20 min, 40 min, and 100 min postinjection.

| organs          | 5 min             | 20 min            | 40 min            | 100 min           |
|-----------------|-------------------|-------------------|-------------------|-------------------|
|                 | mean (%ID/g) ± SD |
| Blood           | 8.770 ± 0.573     | 3.374 ± 0.270     | 1.529 ± 0.081     | 0.470 ± 0.054     |
| Heart           | 2.525 ± 0.421     | 1.160 ± 0.136     | 0.795 ± 0.016     | 0.664 ± 0.042     |
| Lung            | 4.250 ± 0.638     | 2.386 ± 0.286     | 2.213 ± 0.038     | 2.090 ± 0.014     |
| Thymus          | 1.560 ± 0.269     | 1.164 ± 0.226     | 0.938 ± 0.047     | 0.609 ± 0.157     |
| Liver           | 2.721 ± 0.203     | 3.760 ± 0.511     | 4.751 ± 0.087     | 4.429 ± 0.134     |
| Pancreas        | 1.588 ± 0.056     | 0.799 ± 0.068     | 0.642 ± 0.094     | 0.534 ± 0.119     |
| Spleen          | 1.423 ± 0.212     | 0.718 ± 0.020     | 0.680 ± 0.129     | 0.431 ± 0.047     |
| Kidney          | 20.728 ± 2.764    | 12.473 ± 0.542    | 10.978 ± 0.227    | 8.957 ± 0.701     |
| Stomach         | 1.605 ± 0.188     | 1.981 ± 0.146     | 2.125 ± 0.121     | 1.798 ± 0.059     |
| Small intestine | 2.098 ± 0.103     | 2.634 ± 0.396     | 2.742 ± 0.067     | 2.700 ± 0.049     |
| Int. lymph node | 2.388 ± 0.415     | 0.972 ± 0.434     | 0.910 ± 0.200     | 0.578 ± 0.104     |
| Muscle          | 1.703 ± 0.476     | 1.082 ± 0.485     | 0.301 ± 0.013     | 0.197 ± 0.008     |
| Bone            | 1.545 ± 0.083     | 0.899 ± 0.061     | 0.763 ± 0.086     | 0.508 ± 0.049     |
| Testis          | 1.154 ± 0.398     | 0.599 ± 0.016     | 0.543 ± 0.082     | 0.505 ± 0.076     |
| Tumor           | 3.367 ± 0.867     | 2.603 ± 0.225     | 1.794 ± 0.031     | 1.486 ± 0.058     |
| Brain           | 0.296 ± 0.046     | 0.114 ± 0.022     | 0.105 ± 0.002     | 0.079 ± 0.005     |

**Table S2.** Biodistribution of mPep-1-[<sup>64</sup>Cu] in B16F10 tumor bearing mice (*n* = 3) at 5 min, 20 min, 40 min, and 100 min postinjection.

| organs          | 5 min             | 20 min            | 40 min            | 100 min           |
|-----------------|-------------------|-------------------|-------------------|-------------------|
|                 | mean (%ID/g) ± SD |
| Blood           | 6.835 ± 0.356     | 2.310 ± 1.006     | 1.061 ± 0.135     | 0.320 ± 0.081     |
| Heart           | 2.127 ± 0.090     | 0.986 ± 0.489     | 0.529 ± 0.088     | 0.440 ± 0.170     |
| Lung            | 3.255 ± 0.101     | 1.954 ± 0.963     | 1.580 ± 0.229     | 1.637 ± 0.637     |
| Thymus          | 1.154 ± 0.278     | 0.802 ± 0.288     | 0.660 ± 0.171     | 0.496 ± 0.132     |
| Liver           | 2.467 ± 0.140     | 3.262 ± 1.476     | 3.698 ± 0.954     | 3.819 ± 1.308     |
| Pancreas        | 1.323 ± 0.122     | 0.730 ± 0.287     | 0.471 ± 0.074     | 0.430 ± 0.148     |
| Spleen          | 5.243 ± 0.285     | 2.456 ± 1.080     | 1.927 ± 0.354     | 1.268 ± 0.428     |
| Kidney          | 22.840 ± 1.389    | 14.002 ± 6.441    | 11.310 ± 1.953    | 10.248 ± 3.691    |
| Stomach         | 1.802 ± 0.127     | 1.265 ± 0.592     | 1.063 ± 0.255     | 1.637 ± 0.482     |
| Small intestine | 1.455 ± 0.155     | 1.550 ± 0.683     | 1.730 ± 0.687     | 2.215 ± 0.495     |
| Int. lymph node | 3.260 ± 0.866     | 0.558 ± 0.249     | 0.479 ± 0.123     | 0.404 ± 0.127     |
| Muscle          | 1.391 ± 0.404     | 0.939 ± 0.285     | 0.455 ± 0.047     | 0.423 ± 0.245     |
| Bone            | 1.256 ± 0.126     | 0.824 ± 0.321     | 0.958 ± 0.359     | 0.577 ± 0.124     |
| Testis          | 1.209 ± 0.383     | 1.089 ± 0.454     | 0.698 ± 0.059     | 0.533 ± 0.211     |
| Tumor           | 5.522 ± 1.353     | 4.475 ± 1.560     | 4.079 ± 1.323     | 1.887 ± 0.229     |
| Brain           | 0.212 ± 0.012     | 0.126 ± 0.053     | 0.126 ± 0.038     | 0.058 ± 0.009     |

**Table S3.** A summary of PD-1 targeting radiotracers in references<sup>1-11</sup>. <sup>a</sup>The best time point for PET imaging after intravenous injection. <sup>b</sup>The ratios were calculated according to either the quantification of PET images or ex vivo biodistribution data.

| Entry | Probe name        | Tracer type  | Molecular weight | Labeling                              | Timing  | Major clearance organs | Tumor to blood ratio | Tumor to muscle ratio | Targeting specificity | Tumor type | Publishing year | reference  |
|-------|-------------------|--------------|------------------|---------------------------------------|---------|------------------------|----------------------|-----------------------|-----------------------|------------|-----------------|------------|
| 1     | DOTA-PD-1         | mAb          | -                | <sup>64</sup> Cu                      | 24 h    | liver, kidney          | 0.8                  | 11                    | mouse                 | B16F10     | 2015            | [1]        |
| 2     | NOTA-PD-1         | mAb          | -                | <sup>64</sup> Cu                      | 24 h    | kidney, liver          | -                    | -                     | mouse                 | B16        | 2016            | [2]        |
| 3     | nivolumab         | mAb          | 146 Kda          | <sup>89</sup> Zr                      | 24 h    | liver                  | -                    | -                     | non-human primates    | -          | 2016            | [3]        |
| 4     | PD-1-Liposome-DOX | liposome-mAb | -                | <sup>64</sup> Cu                      | 12 h    | liver, kidney          | -                    | ~10                   | mouse                 | 4T1        | 2017            | [4]        |
| 5     | Pembrolizumab     | mAb          | 149 Kda          | <sup>89</sup> Zr                      | 24 h    | liver, kidney          | -                    | -                     | mouse                 | -          | 2017            | [5]        |
| 6     | Pembrolizumab     | mAb          | 149 Kda          | <sup>89</sup> Zr and <sup>64</sup> Cu | 24 h    | liver, kidney          | 1.5-2                | 25                    | mouse                 | A375       | 2017            | [6]        |
| 7     | nivolumab         | mAb          | 146 KDa          | <sup>89</sup> Zr                      | 24 h    | liver, kidney          | 2-4                  | 5-8                   | mouse                 | A549       | 2018            | [7]        |
| 8     | Pembrolizumab     | mAb          | 149 Kda          | <sup>64</sup> Cu                      | 24 h    | liver, kidney          | 1.5-2                | ~10                   | mouse                 | 293T       | 2018            | [8]        |
| 9     | nivolumab         | mAb          | 146 KDa          | <sup>89</sup> Zr                      | 162 h   | liver                  | -                    | -                     | human                 | NSCLC      | 2018            | [0]        |
| 10    | JS001             | mAb          | 149 KDa          | <sup>99m</sup> Tc                     | 8 h     | kidney, liver          | -                    | -                     | mouse                 | BCG823     | 2019            | [10]       |
| 11    | JS001             | mAb          | 149 KDa          | <sup>124</sup> I                      | 24 h    | liver, kidney          | 1.5                  | 8                     | mouse                 | S180       | 2020            | [11]       |
| 12    | mPep-1            | peptide      | ~2 Kda           | <sup>64</sup> Cu                      | 0.5-1 h | kidney                 | ~4                   | ~9                    | mouse                 | B16F10     | 2020            | this study |

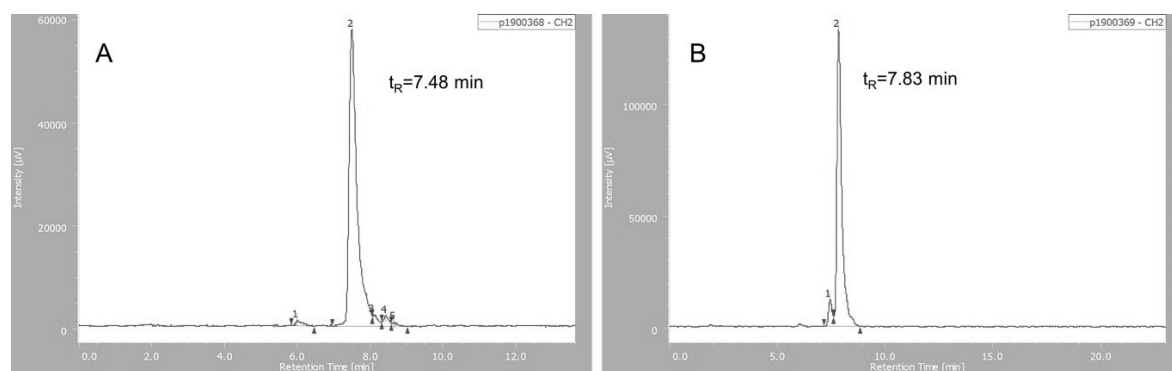

**Figure S1.** RP-HPLC chromatograms of hPep-1-[<sup>64</sup>Cu] (A) and mPep-1-[<sup>64</sup>Cu] (B).

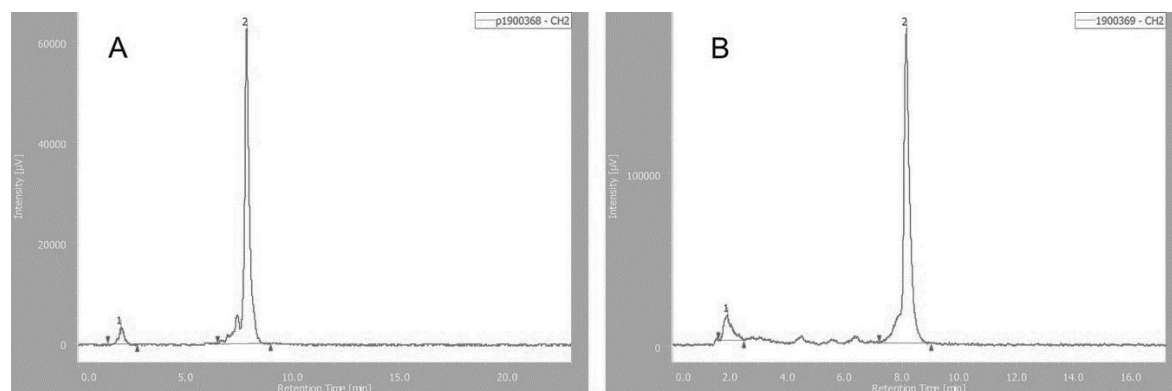

**Figure S2.** Stability analysis of hPep-1-[<sup>64</sup>Cu] (A) and mPep-1-[<sup>64</sup>Cu] (B) in mouse serum after 1 hour incubation.

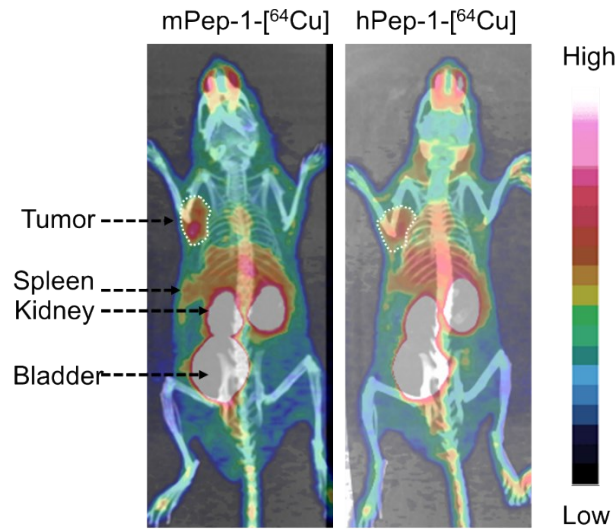

**Figure S3.** Representative maximum intensity projection (MIP) PET images co-registered with CT images in C57BL/6J mice bearing B16F10 show the whole-body of mouse after injected with mpep-1-[<sup>64</sup>Cu] or hpep-1-[<sup>64</sup>Cu] for 40 min.

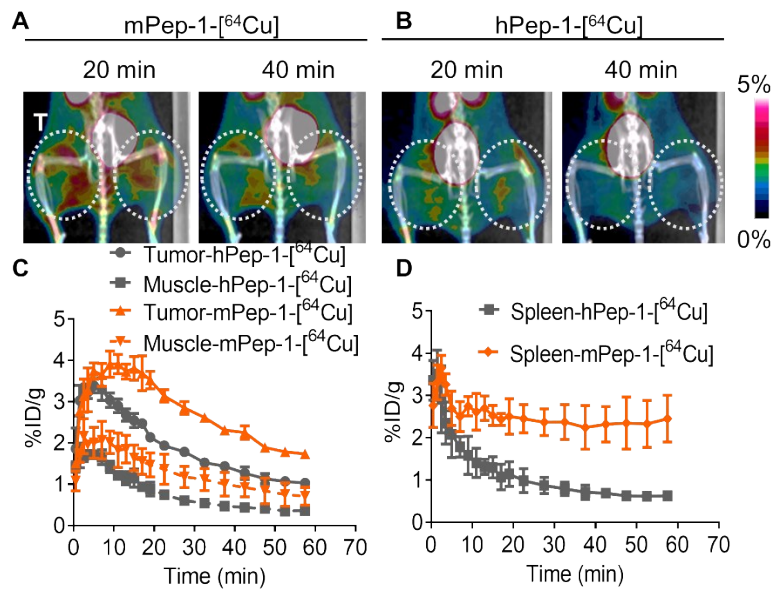

**Figure S4.** PET-CT co-registration images and regions of interest (ROI) curves of selected organs in C57BL/6J mice bearing-B16F10 tumors. MIPs PET-CT images of mice post-injection of (A) mPep-1-[<sup>64</sup>Cu] and (B) hPep-1-[<sup>64</sup>Cu] for 20 min and 40 min. The white dashed circles indicate the tumors. (C) Tumor and muscle (D) spleen uptakes were estimated from the ROI of PET-CT images.

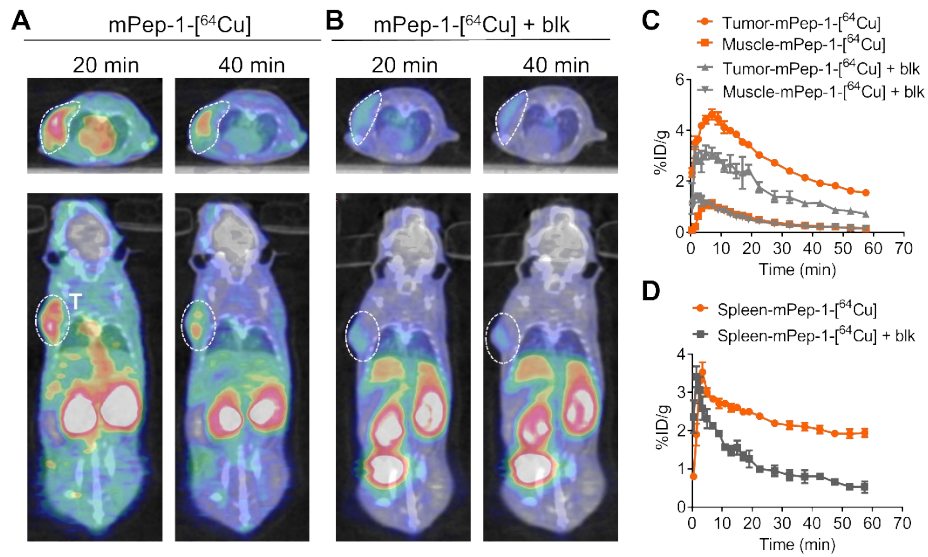

**Figure S5.** PET-CT co-registration images and regions of interest (ROI) curves of selected organs in B16F10-bearing C57BL/6J mice. Representative coronal and axial PET-CT images of mice post-injection of (A) mPep-1-[<sup>64</sup>Cu] and (B) co-injection of mPep-1-[<sup>64</sup>Cu] + mPep-1-DOTA (5 mg kg<sup>-1</sup>) for 20 min and 40 min. Areas within the white dashed circles indicate the tumors. (C) Tumor and muscle and (D) spleen uptake was estimated from the ROI of PET-CT images, for each curve, the error bars represent standard deviations (SD), *n* = 3.

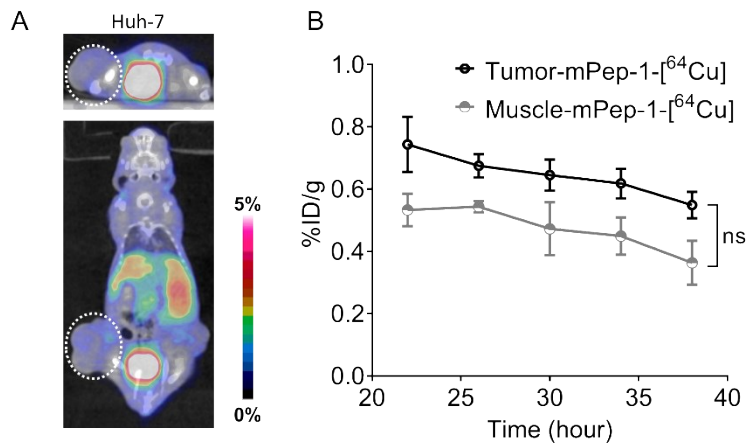

**Figure S6.** PET-CT images in Huh-7 bearing Balb/c nude mice. (A) Coronal and axial PET-CT images of mice post-injection of mPep-1-[<sup>64</sup>Cu] for 20 min. The white dashed circles indicate the tumor. (B) Tumor and muscle uptakes were estimated from the ROI of PET-CT images.





# mpep-1-DOTA

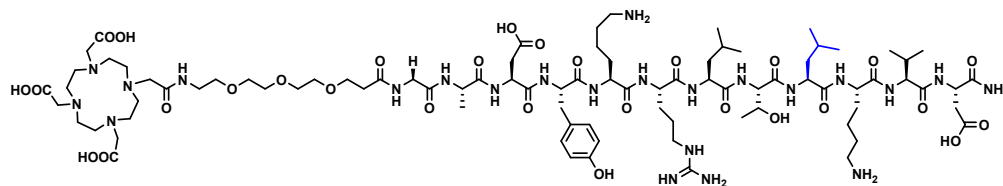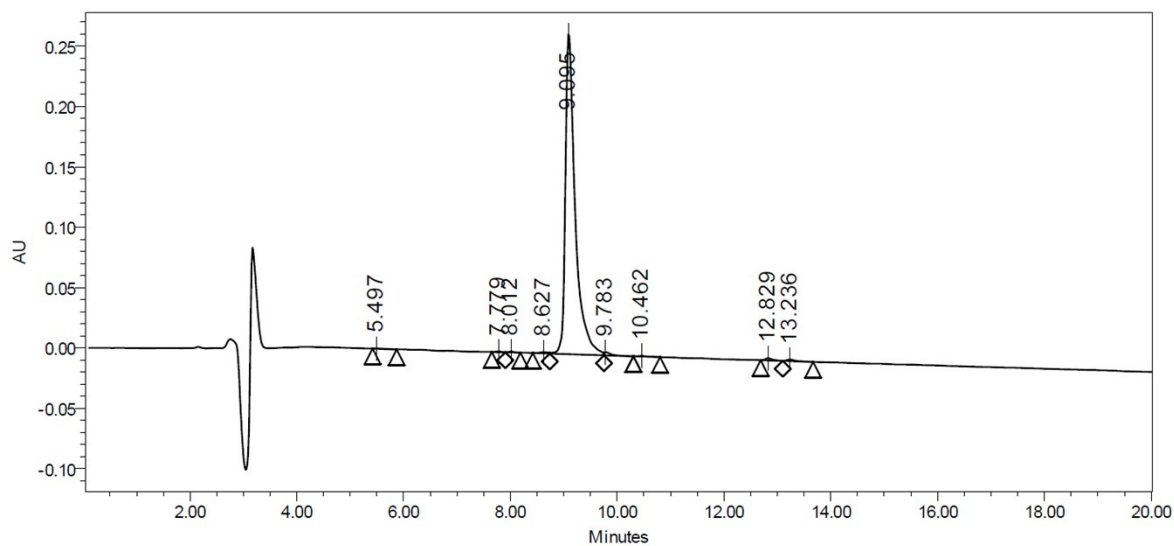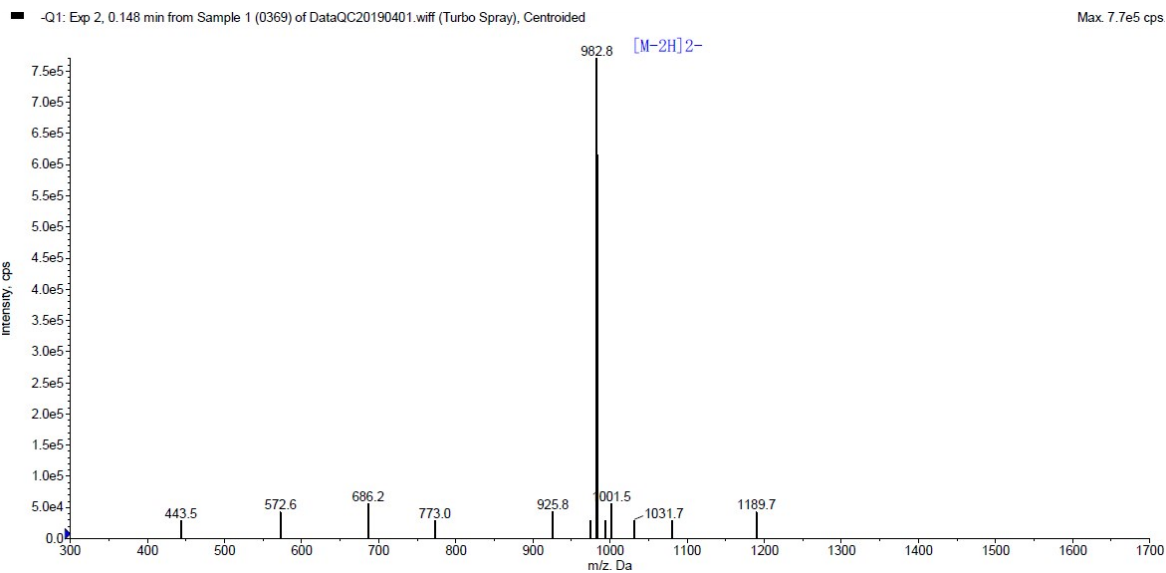

1. A. Natarajan, A. T. Mayer, L. Xu, R. E. Reeves, J. Gano and S. S. Gambhir, *Novel Radiotracer for ImmunoPET Imaging of PD-1 Checkpoint Expression on Tumor Infiltrating Lymphocytes, Bioconjugate chemistry*, 2015, **26**, 2062-2069.
2. M. Hettich, F. Braun, M. D. Bartholoma, R. Schirmbeck and G. Niedermann, *High-Resolution PET Imaging with Therapeutic Antibody-based PD-1/PD-L1 Checkpoint Tracers, Theranostics*, 2016, **6**, 1629-1640.
3. E. L. Cole, J. Kim, D. J. Donnelly, R. A. Smith, D. Cohen, V. Lafont, P. E. Morin, R. Y. C. Huang, P. L. Chow, W. Hayes and S. Bonacorsi, *Radiosynthesis and preclinical PET evaluation of 89Zr-nivolumab (BMS-936558) in healthy non-human primates, Bioorganic & Medicinal Chemistry*, 2017, **25**, 5407-5414.
4. Y. Du, X. Liang, Y. Li, T. Sun, Z. Jin, H. Xue and J. Tian, *Nuclear and Fluorescent Labeled PD-1-Liposome-DOX-(64)Cu/IRDye800CW Allows Improved Breast Tumor Targeted Imaging and Therapy, Molecular pharmaceuticals*, 2017, **14**, 3978-3986.
5. C. G. England, E. B. Ehlerding, R. Hernandez, B. T. Rekoske, S. A. Graves, H. Sun, G. Liu, D. G. McNeel, T. E. Barnhart and W. Cai, *Preclinical Pharmacokinetics and Biodistribution Studies of 89Zr-Labeled Pembrolizumab, Journal of Nuclear Medicine*, 2017, **58**, 162-168.
6. A. Natarajan, A. T. Mayer, R. E. Reeves, C. M. Nagamine and S. S. Gambhir, *Development of Novel ImmunoPET Tracers to Image Human PD-1 Checkpoint Expression on Tumor-Infiltrating Lymphocytes in a Humanized Mouse Model, Molecular imaging and biology : MIB : the official publication of the Academy of Molecular Imaging*, 2017, **19**, 903-914.
7. C. G. England, D. Jiang, E. B. Ehlerding, B. T. Rekoske, P. A. Ellison, R. Hernandez, T. E. Barnhart, D. G. McNeel, P. Huang and W. Cai, *(89)Zr-labeled nivolumab for imaging of T-cell infiltration in a humanized murine model of lung cancer, European journal of nuclear medicine and molecular imaging*, 2018, **45**, 110-120.
8. A. Natarajan, C. B. Patel, F. Habte and S. S. Gambhir, *Dosimetry Prediction for Clinical Translation of (64)Cu-Pembrolizumab ImmunoPET Targeting Human PD-1 Expression, Scientific reports*, 2018, **8**, 633.
9. A. N. Niemeijer, D. Leung, M. C. Huisman, I. Bahce, O. S. Hoekstra, G. A. M. S. van Dongen, R. Boellaard, S. Du, W. Hayes, R. Smith, A. D. Windhorst, N. H. Hendrikse, A. Poot, D. J. Vugts, E. Thunnissen, P. Morin, D. Lipovsek, D. J. Donnelly, S. J. Bonacorsi, L. M. Velasquez, T. D. de Gruijl, E. F. Smit and A. J. de Langen, *Whole body PD-1 and PD-L1 positron emission tomography in patients with non-small-cell lung cancer, Nature communications*, 2018, **9**, 4664.
10. X. Guo, H. Zhu, T. Liu, X. Xu, Y. Kong, S. Yao, X. Sheng and Z. Yang, *Development of (99m)Tc-conjugated JS001 antibody for in vivo mapping of PD-1 distribution in murine, Bioorganic & medicinal chemistry letters*, 2019, DOI: 10.1016/j.bmcl.2019.06.019.
11. H. Huang, H. Zhu, Q. Xie, X. Tian, X. Yang, F. Feng, Q. Jiang, X. Sheng and Z. Yang, *Evaluation of 124I-JS001 for hPD1 immuno-PET imaging using sarcoma cell homografts in humanized mice, Acta Pharmaceutica Sinica B*, 2020, DOI: 10.1016/j.apsb.2020.02.004.
